# Supplementary material for: Multicolor Luminescent Carbon Dots: Tunable Photoluminescence, Excellent Stability, and Their Application in Light-Emitting Diodes
Source: MDPI journal article supplement (doi:10.3390/nano12183132), 2022-09-09
Supplement: s1 [file s1]

# Multicolor Luminescent Carbon Dots: Tunable Photoluminescence, Excellent Stability, and their Application in Light-Emitting Diodes

Longshi Rao <sup>1,2,\*</sup>, Qing Zhang <sup>1,2</sup>, Bin Sun <sup>1,2</sup>, Mingfu Wen <sup>1,2</sup>, Jiayang Zhang <sup>1,2</sup>, Guisheng Zhong <sup>1,2</sup>, Ting Fu <sup>3</sup> and Xiaodong Niu <sup>1,2</sup>

<sup>1</sup> Department of Mechanical Engineering, College of Engineering, Shantou University, Shantou 515063, China

<sup>2</sup> Intelligent Manufacturing Key Laboratory of Ministry of Education, Shantou University, Shantou 515063, China

<sup>3</sup> Hubei Key Laboratory of Mechanical Transmission and Manufacturing Engineering, Wuhan University of Science and Technology, Wuhan 430081, China

\* Correspondence: lsrao@stu.edu.cn; Tel.: +86-19865045018

**Table S1.** The reagents and solvents were used to prepare each sample.

| Samples | Ammonium<br>citrate (g) | H <sub>2</sub> O<br>(mL) | DMF<br>(mL) | Time<br>(Hours) | Temperature<br>(°C) | Typical<br>CDs |
|---------|-------------------------|--------------------------|-------------|-----------------|---------------------|----------------|
| 0D      | 3.9                     | 50                       | 0           | 8               | 200                 | B-CDs          |
| 5D      | 3.9                     | 45                       | 5           | 8               | 200                 |                |
| 10D     | 3.9                     | 40                       | 10          | 8               | 200                 |                |
| 15D     | 3.9                     | 35                       | 15          | 8               | 200                 |                |
| 20D     | 3.9                     | 30                       | 20          | 8               | 200                 | G-CDs          |
| 25D     | 3.9                     | 25                       | 25          | 8               | 200                 |                |
| 30D     | 3.9                     | 20                       | 30          | 8               | 200                 | Y-CDs          |
| 35D     | 3.9                     | 15                       | 35          | 8               | 200                 |                |
| 40D     | 3.9                     | 10                       | 40          | 8               | 200                 | R-CDs          |
| 45D     | 3.9                     | 5                        | 45          | 8               | 200                 |                |
| 50D     | 3.9                     | 0                        | 50          | 8               | 200                 |                |
